# Supplementary material for: Development of a multifunctional graphene/Fe-loaded polyester textile: robust electrical and catalytic properties
Source: Royal Society of Chemistry journal article supplement (doi:10.1039/d0dt03291c), 2020-01-01
Supplement: d0dt03291c1.pdf [file d0dt03291c1.pdf]

----- Supplementary information -----

**Development of multifunctional graphene/Fe-loaded polyester textile:  
robust electrical and catalytic properties**

**Mohammad Neaz Morshed<sup>1, 2, 3, 4</sup>, Milad Asadi Miankafshe<sup>5, 6, \*</sup>, Nils Krister Persson<sup>5, 6</sup>, Nemeswaree Behary<sup>2, 3</sup>, and Vincent A. Nierstrasz<sup>1</sup>**

<sup>1</sup>*Textile Materials Technology, Department of Textile Technology, The Swedish School of Textiles, Faculty of Textiles, Engineering and Business, University of Borås, SE-50190, Borås, Sweden*

<sup>2</sup>*Ecole Nationale Supérieure des Arts et Industries Textiles (ENSAIT), GEMTex Laboratory, 59056 Roubaix, France*

<sup>3</sup>*Université de Lille, Nord de France, F-59000 Lille, France*

<sup>4</sup>*College of Textile and Clothing Engineering, Soochow University, 215006 Suzhou, China*

<sup>5</sup>*The Swedish School of Textile, Polymeric E-textiles, University of Borås, SE-501 90 Borås, Sweden.*

<sup>6</sup>*Smart Textiles, University of Borås, SE-501 90 Borås, Sweden*

\*Corresponding author: Ph-+46763319111, E-mail: [milad.asadi@hb.se](mailto:milad.asadi@hb.se) (Milad Asadi Miankafshe)

## 1. EXPERIMENTAL

### 1.1. Polyester nonwoven

**Table S1:** Physical characteristics of polyester nonwoven membranes

| Physical characteristics               | Values |
|----------------------------------------|--------|
| Mass per unit area (g/m <sup>2</sup> ) | 98.00  |
| Thicknesses (mm)                       | 0.94   |
| Fibre density                          | 0.80   |
| Porosity (%)                           | 99.91  |
| Air permeability (mm/s)                | 854.20 |

## 2. RESULTS

### 2.1.

### Particle size distribution and digital

### images of polyester nonwoven fabrics

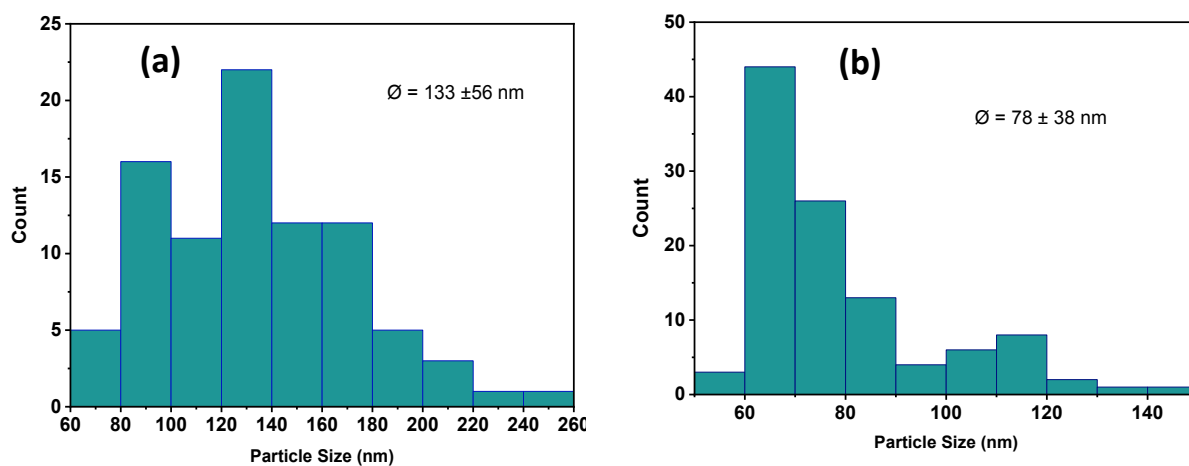

**Fig. S1:** Particle size distribution of zerovalent iron nanoparticles; (a) PET-rGO- Fe<sup>0</sup> and (b) PET-PAM-rGO- Fe<sup>0</sup>

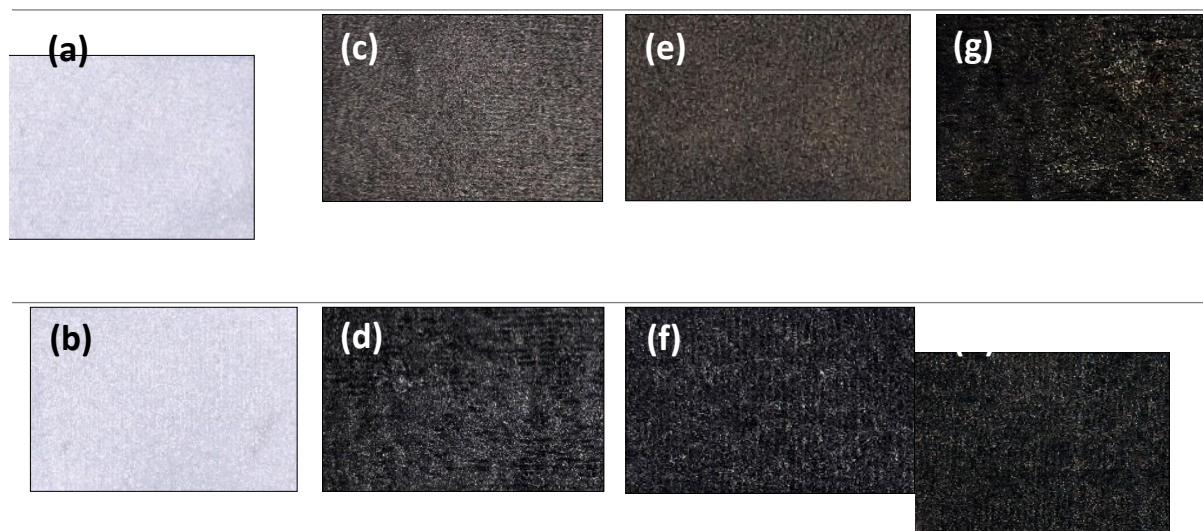

**Fig. S2:** Digital Images of the samples (a) PET, (b) PET-PAM, (c) PET-GO, (d) PET-rGO, (e) PET-PAM-GO, (f) PET-PAM-rGO, (g) PET-rGO-Fe<sup>0</sup> and (h) PET-PAM-rGO-Fe<sup>0</sup>.

## 2.2. The color strength and the coating evenness measurement

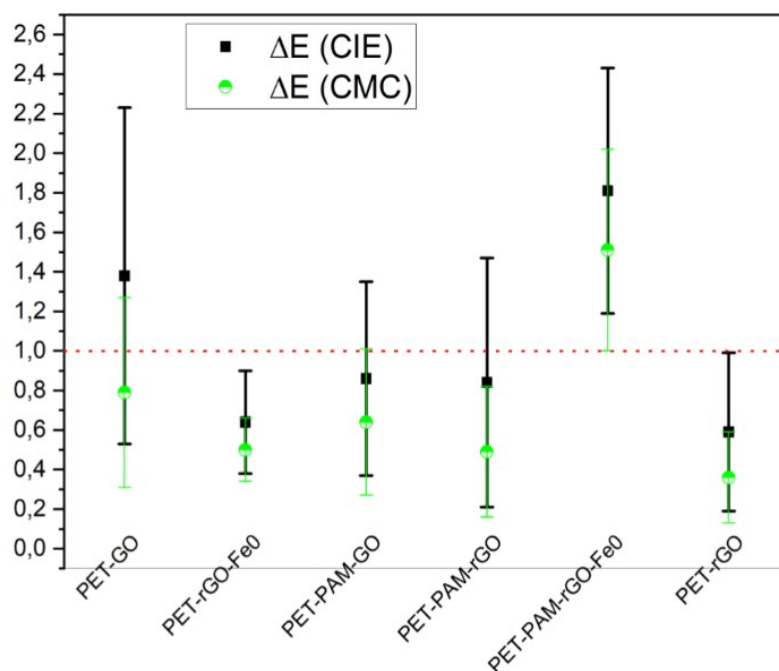

**Fig. S3:** The color differences ( $\Delta E$ ) of CIE and CMC systems (Values less than 1 are the smallest color differences than the human eye can detect)

## 2.3. X-ray photoelectron spectroscopy (XPS) analysis

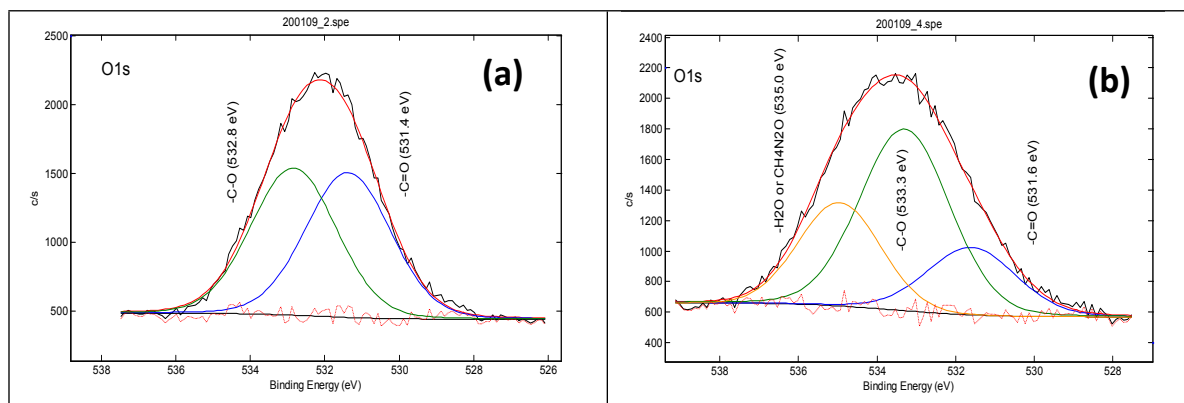

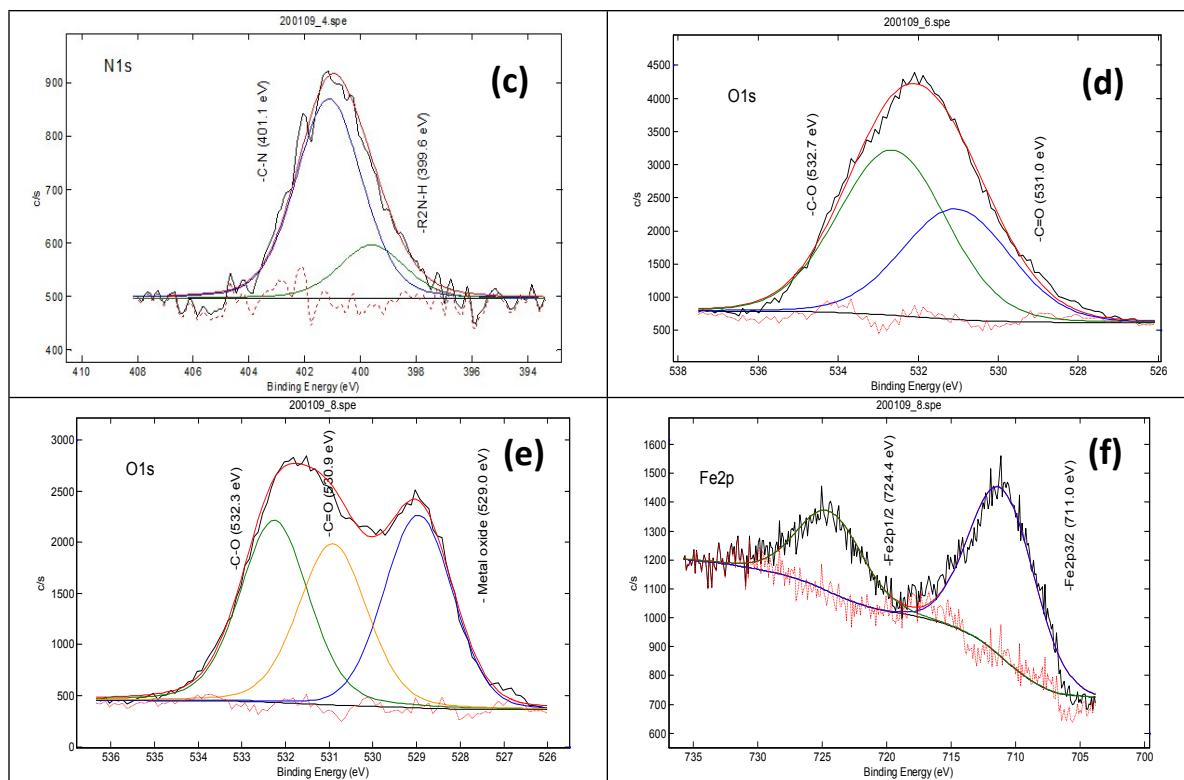

**Fig. S4:** O1s XPS analysis of (a) PET, (b) O1s XPS analysis of PET-PAM, (c) N1s XPS analysis of PET-PAM (d) O1s XPS analysis of PET-PAM-GO, (e) O1s XPS analysis of PET-PAM-rGO-Fe<sup>0</sup> and (f) Fe2p XPS analysis of PET-PAM-rGO-Fe<sup>0</sup>

#### 2.4. Thermogravimetric analysis (TGA)

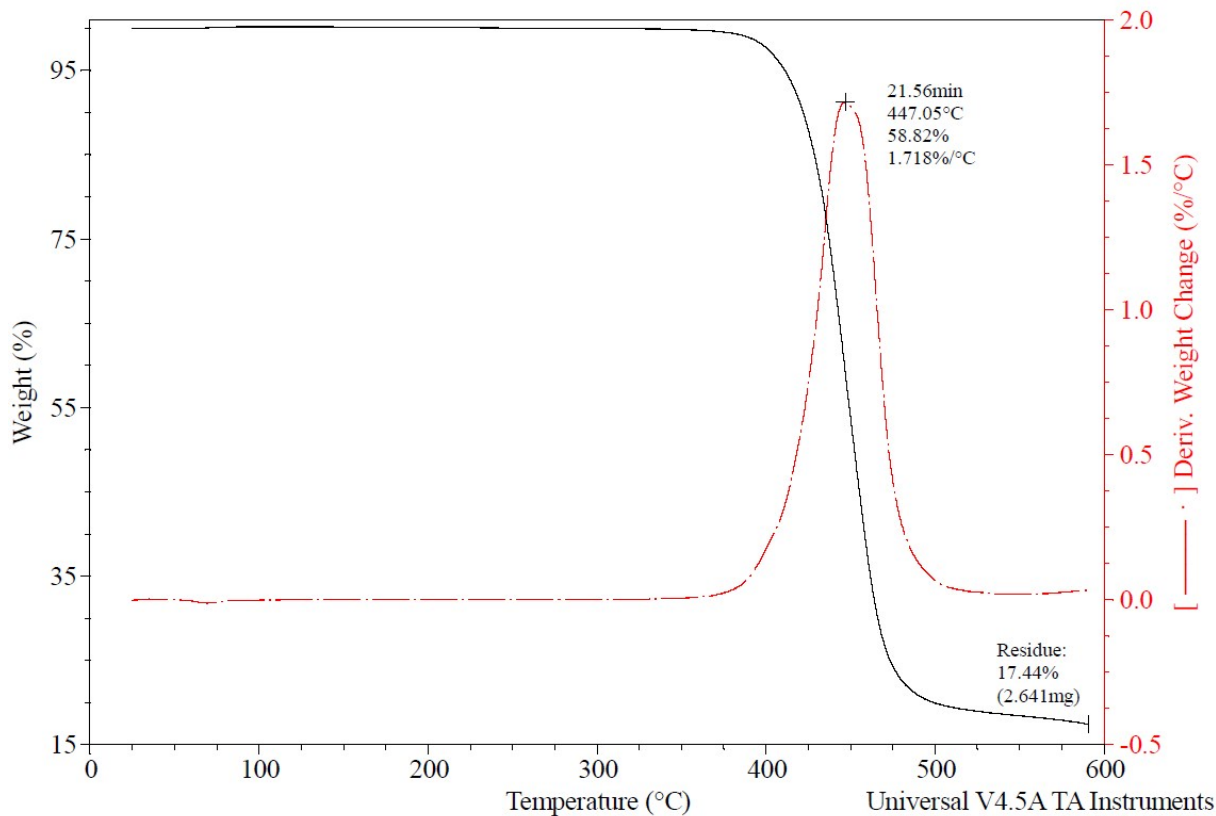

**Fig. S5:** TGA-DTG curve of untreated PET

**Table S2:** Summary of TGA and DTG data of samples in a nitrogen atmosphere.

| Sample                       | T <sub>onset</sub> (°C) | T <sub>max</sub> (°C) | Residue at T <sub>max</sub> (%) | Residue at 600 °C (%) |
|------------------------------|-------------------------|-----------------------|---------------------------------|-----------------------|
| Pristine PET                 | 410                     | 452                   | 51.08                           | 16.6                  |
| PET                          | 411                     | 448                   | 48.92                           | 17.4                  |
| PET-GO                       | 409                     | 463                   | 47.28                           | 17.2                  |
| PET-rGO-Fe <sup>0</sup>      | 343                     | 447                   | 67.43                           | 47.6                  |
| PET-PAM                      | 410                     | 450                   | 52.88                           | 17.2                  |
| PET-PAM-GO                   | 409                     | 460                   | 53.02                           | 19.5                  |
| PET-PAM-rGO                  | 411                     | 455                   | 54.42                           | 21                    |
| PET-PAM-rGO- Fe <sup>0</sup> | 324                     | 446                   | 80.22                           | 69.8                  |
| PET-rGO                      | 412                     | 454                   | 54.29                           | 21.25                 |

## 2.5. Differential scanning calorimetry (DSC) analysis

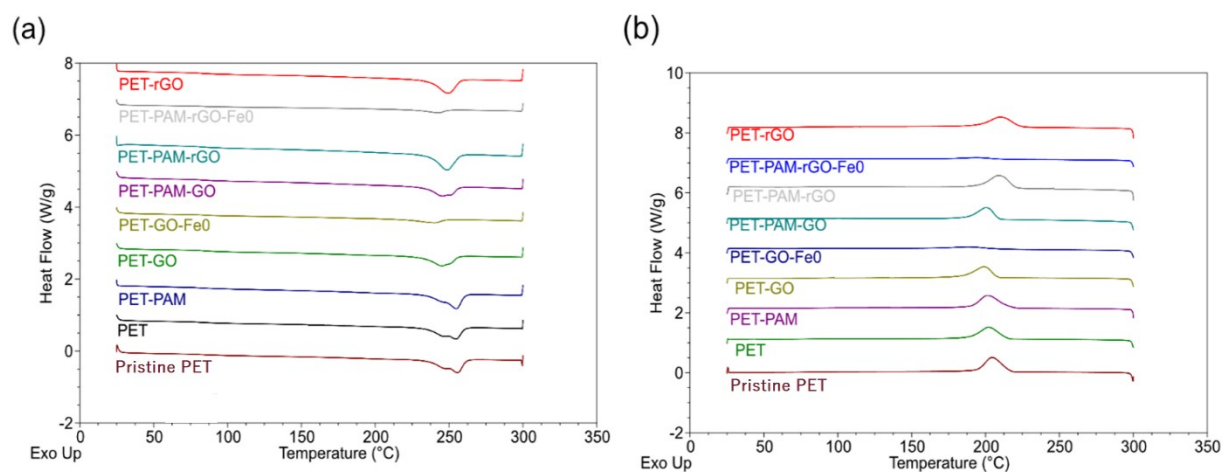

**Fig. S6:** DSC thermographs of samples, (a) second heating cycle and (b) cooling cycle.

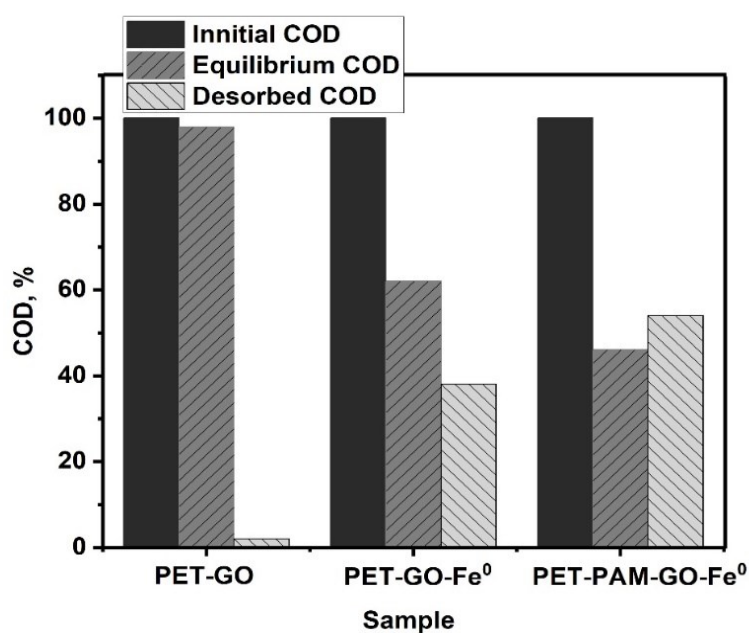

**Fig. S7:** Relative toxicity reduction analysis (a) untreated solution (control solution), (b) PET-rGO-Fe<sup>0</sup> treated solution and (c) PET-PAM-rGO-Fe<sup>0</sup> treated solution.
